# Supplementary material for: The Liver Plays a Major Role in Clearance and Destruction of Blood Trypomastigotes in Trypanosoma cruzi Chronically Infected Mice
Source: PubMed Central journal article supplement (PMC2793026; doi:10.1371/journal.pntd.0000578), 2010-01-05
Supplement: pntd.0000578.s001.pdf [file pntd.0000578.s001.pdf]

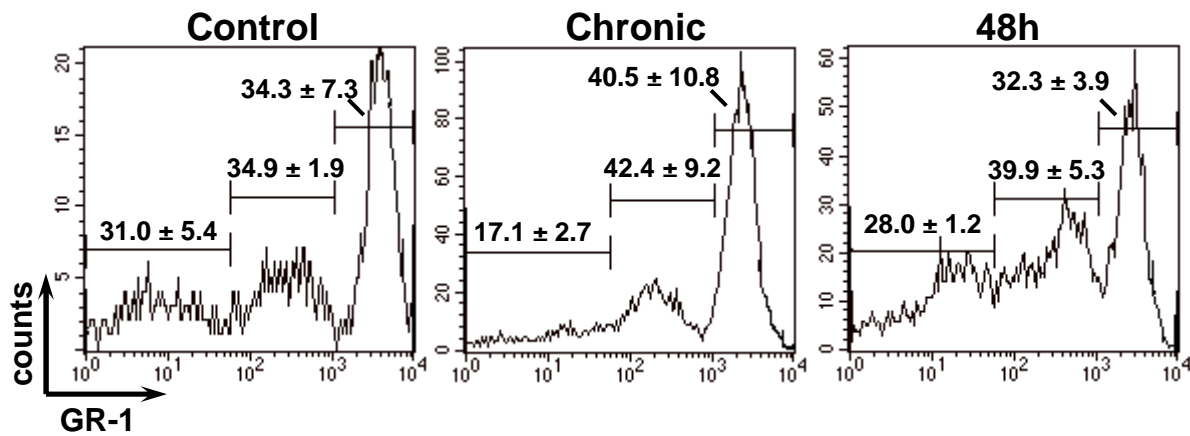

**Supplementary figure S1 – GR-1 expression by Mac-1<sup>+</sup>CD4<sup>-</sup>CD8<sup>-</sup>B220<sup>-</sup> cells in the liver of unchallenged and challenged chronic mice.** C57BL/6 mice infected for 7 months with *T. cruzi* parasites were challenged i.v. with 5x10<sup>6</sup> homologous trypomastigotes and, after 48 h, the liver leukocytes analyzed by flow cytometry. Control and chronic mice were also included. GR-1 expression by gated Mac1<sup>+</sup>CD4<sup>-</sup>CD8<sup>-</sup>B220<sup>-</sup>. Numbers indicate the mean ± SD of percentages of cells with low, intermediate and high GR-1 expression. Representative histograms of one experiment (n=3) out of two are shown.
